# Supplementary material for: Operando X-ray absorption spectroscopic flow cell for electrochemical CO2 reduction: new insight into the role of copper species
Source: Royal Society of Chemistry journal article supplement (doi:10.1039/d4cy00602j), 2024-12-02
Supplement: d4cy00602j1.pdf [file d4cy00602j1.pdf]

## Supplementary Information (SI)

### *Operando* X-ray absorption spectroscopic flow cell for electrochemical CO<sub>2</sub> reduction: new insight into the role of copper species

Santhosh K. Matam<sup>1,2,\*</sup>, P. Sharma<sup>3</sup>, E. Yu<sup>3,4\*</sup>, C. Drivas<sup>1,2</sup>, M. D. Khan<sup>3</sup>, M. Wilding<sup>1,2</sup>, N. Ramanan<sup>5</sup>, D. Gianolio<sup>5</sup>, M. A. Isaacs<sup>6,7</sup>, S. Guan<sup>8</sup>, P. R. Davies<sup>2,7</sup>, C. Richard A. Catlow<sup>1,2,6</sup>

<sup>1</sup>*The UK Catalysis Hub, Research Complex at Harwell, Rutherford Appleton Laboratory, Harwell Science and Innovation Campus, OX11 0FA, UK*

<sup>2</sup>*Cardiff Catalysis Institute, School of Chemistry, Cardiff University, Cardiff CF10 3AT, UK*

<sup>3</sup>*Department of Chemical Engineering, Loughborough University, Loughborough, LE11 3TU, UK*

<sup>4</sup>*School of Chemistry and Chemical Engineering, University of Southampton, SO17 1BJ, UK*

<sup>5</sup>*Diamond Light Source Ltd., Harwell Science and Innovation Campus, Didcot OX11 0DE, UK*

<sup>6</sup>*Department of Chemistry, University College London, 20 Gordon Street, London WC1H 0AJ, UK*

<sup>7</sup>*HarwellXPS, Research Complex at Harwell, Rutherford Appleton Laboratory, Harwell Science and Innovation Campus, OX11 0FA, UK*

<sup>8</sup>*Maxwell Centre, Cavendish Laboratory, University of Cambridge, JJ Thomson Avenue, Cambridge, CB3 0HE*

*\*Corresponding authors: [santhosh.matam@rc-harwell.ac.uk](mailto:santhosh.matam@rc-harwell.ac.uk); [eileen.yu@soton.ac.uk](mailto:eileen.yu@soton.ac.uk)*

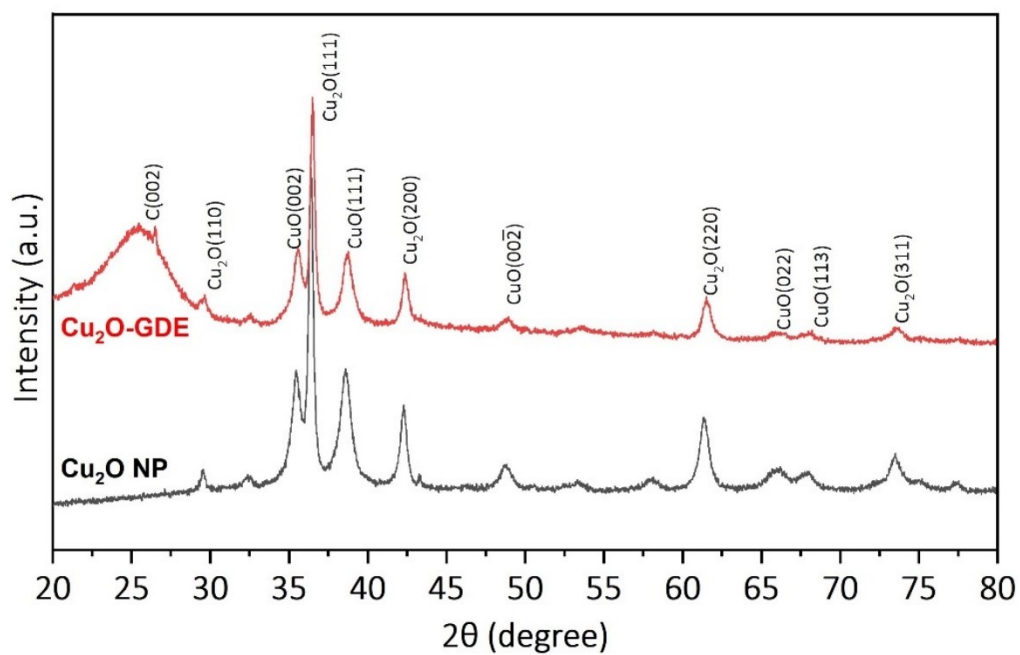

Fig. S1. XRD patterns of the fresh Cu-GDE and commercial  $\text{Cu}_2\text{O}$  nanoparticles.

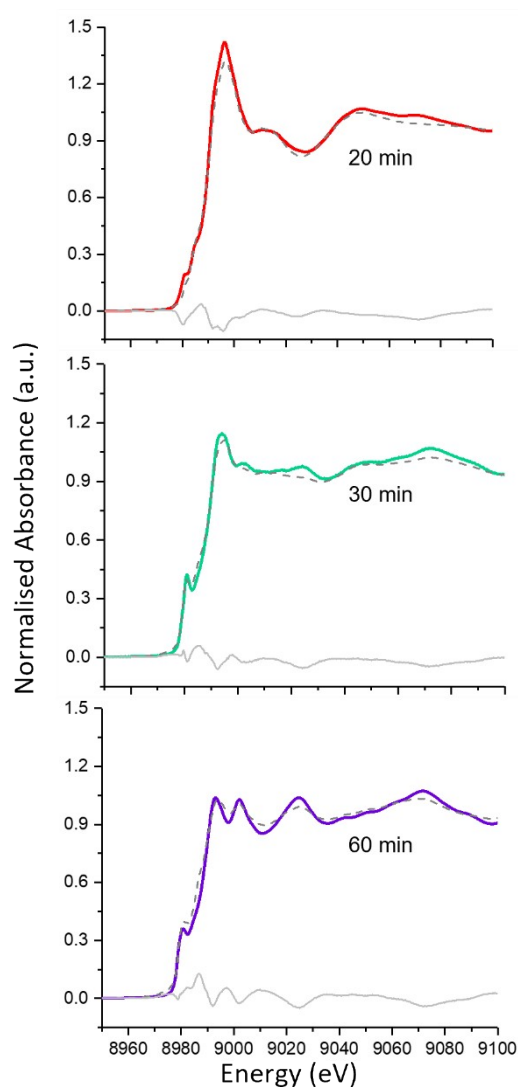

Fig. S2. Linear combination analyses (LCA) of in situ XANES spectra of Cu-GDE during the eCO<sub>2</sub>R reaction. Experimental XANES spectra are shown with solid lines while fits are displayed in dashed lines. Residues of fits are in grey lines at the bottom of the plots, and they indicate that the fit between the experimental data and model compounds employed for LCA is good.

For the XPS fitting, the relative position, area ratio, and FWHM of the peaks were fixed, according to the parameters of Biesinger, assuming the presence of CuO and Cu<sub>2</sub>O (Table S1). For the CuO, the peak shape was a Gaussian-Lorentzian mix, GL(30), while for the Cu(I)/Cu(0) was GL(80).

Table S1. Fitting parameters of the XPS spectra.

|                 | Peak 1        |             |        | Peak 2        |           |        | Peak 3        |           |        | Peak 4        |           |        | Peak 5        |           |        |
|-----------------|---------------|-------------|--------|---------------|-----------|--------|---------------|-----------|--------|---------------|-----------|--------|---------------|-----------|--------|
|                 | position (eV) | FWHM (eV)   | area % | position (eV) | FWHM (eV) | area % | position (eV) | FWHM (eV) | area % | position (eV) | FWHM (eV) | area % | position (eV) | FWHM (eV) | area % |
| Cu(II)          | 933.1<br>±0.1 | 2.2<br>±0.2 | 31     | 934.5         | 3.3       | 33     | 940.5         | 1.1       | 3      | 941.7         | 3.9       | 28     | 943.7         | 1.3       | 6      |
| Cu(I)<br>/Cu(0) | 932.2<br>±0.1 | 1.5<br>±0.2 | 100    | -             |           |        | -             |           |        | -             |           |        | -             |           |        |

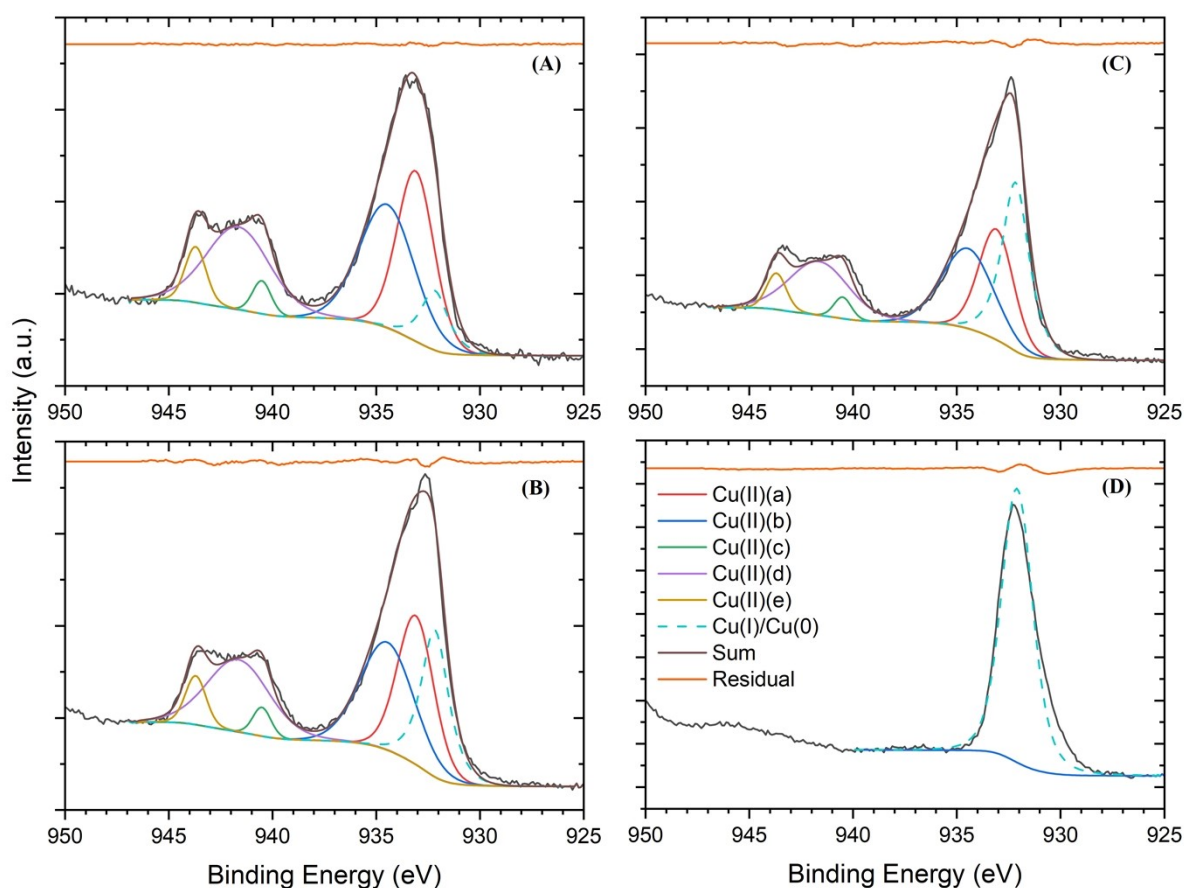

Fig. S3. High resolution quasi *in situ* XPS spectra with individual components of the peak fitting, of Cu 2p of Cu-GDE during the reaction, overall fitting envelope and the residual of the fitting: the Cu-GDE at time 0 (A), 20 (B), 30 (C) and 60 (D) min.
